# Supplementary material
Source: PubMed Central journal article supplement (PMC5454505)
Supplement: 10.1194_M073445_jlr.M073445-2.pdf [file 10.1194_M073445_jlr.M073445-2.pdf]

**Supplement Figure 2: Concentration dependent effects of intracellular synthesis of MADAG and TAG in CHO-K1 cells by Compound A and B.**

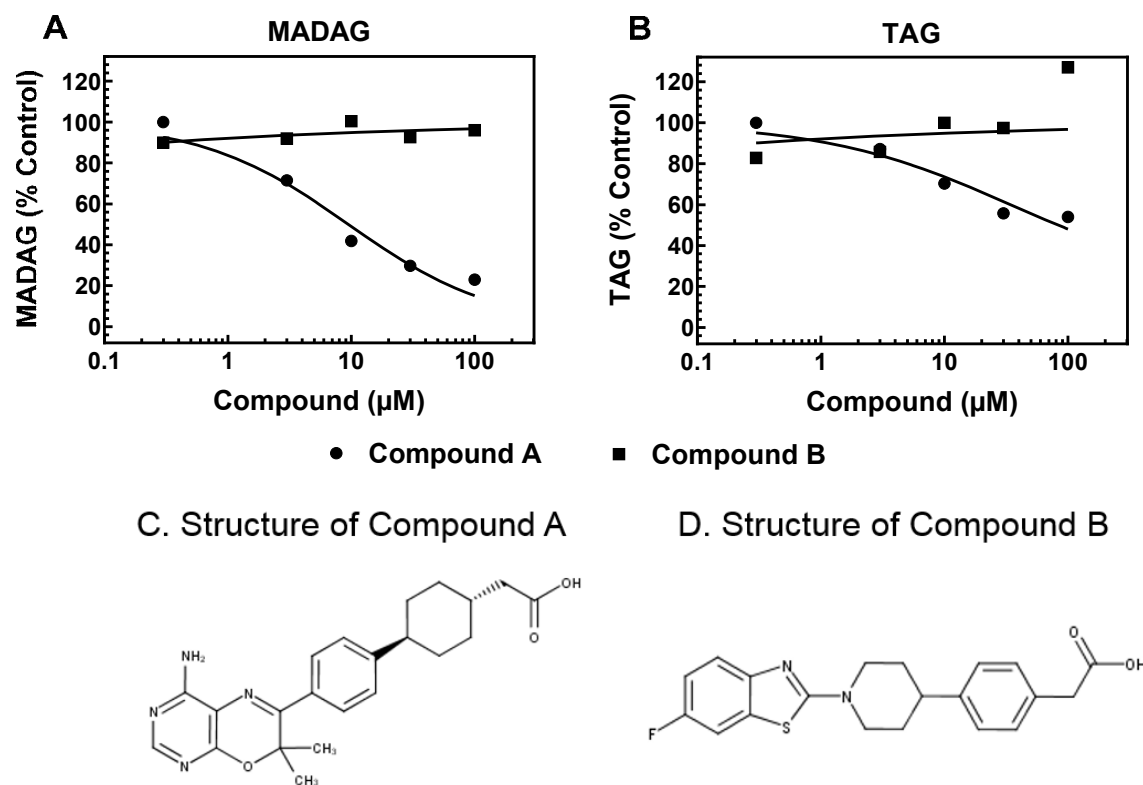

The lipid synthesis of CHO-K1 cells was analyzed in 6-well plates when cells were at ~90% confluence. The cells were incubated with 0.5 mM [<sup>14</sup>C]-oleic acid for 1 hour in the absence or presence of a series of concentrations of Compound A or B. (A) Compound A and B concentration dependent effects of intracellular synthesis of MADAG in CHO-K1 cells. IC<sub>50</sub> for Compound A was 9.5 µM. Compound B had no effect. (B) Compound A and B concentration dependent inhibition of intracellular synthesis of TAG in CHO-K1 cells. Compound A showed about 50% inhibition at 100 µM, while compound B had no effect. (C) Structure of Compound A. (D) Structure of Compound B.
